# Supplementary material for: SlZIP11 mediates zinc accumulation and sugar storage in tomato fruits
Source: PeerJ. 2024 May 29;12:e17473. doi: 10.7717/peerj.17473 (PMC11143971; doi:10.7717/peerj.17473)
Supplement: Supplemental Information 3 — Relative expression pattern of SlZIP11 in different tissues of MT tomato during different development stages. IMG: immature green fruits (10 day post-anthesis); MG: mature green fruits (35DPA); BR: breaker fruits (38DPA); RR: red ripening fruits (44DPA). The expression data of SlZIP11 in root was normalized to 1. The ACTIN gene was used as the internal reference. (B)The expression level of SlZIP11 in MT leaves and MG after Zn treatment including without ZnSO4 (-Zn: Zn deficient), 2 μM ZnSO4 (control: Zn sufficient) and 100 μM ZnSO4 (Zn toxicity). The ACTIN gene was used as the internal reference. Mean values ± SE of three independent biological replicates are given. Significance compared to control was determined by Student’s t test at *P<0.05, **P<0.01. [file peerj-12-17473-s003.xlsx]

## Sheet: Fig.2
The expression level of SlZIP11 in MT leaves and MG after Zn treatment including without ZnSO4 (-Zn: Zn deficient), 2 mM ZnSO4 (control: Zn sufficient) and 100 mM ZnSO4 (Zn toxicity)
leave
	Zn 0	0.287557	0.108733
	CK	1	0.00773887
	Zn 50	2.46073	0.0984354
mg
	Zn 0	0.626792	0.0857985
	CK	1	0.0843736
	Zn 50	1.39303	0.170724
Relative expression pattern of SlZIP11 in different tissues of MT tomato during different development stages.
Root	1	0.23654
Branch	5.17293	0.305041
Stem	3.09434	0.0947507
Leaves	5.63756	0.298574
Flower	3.55518	0.0943435
IMG	2.45244	0.0830109
MG	6.74063	0.524493
BR	5.17293	0.305041
RR	2.69413	0.816723
Note: For all the result of RT-qPCR shown in this paper was analyzed by BIO-RAD CFX Manager™ system including the relative expression and StDEV. As a result, we may not provide the raw data. Sorry.
