# Supplementary material for: SlZIP11 mediates zinc accumulation and sugar storage in tomato fruits
Source: PeerJ. 2024 May 29;12:e17473. doi: 10.7717/peerj.17473 (PMC11143971; doi:10.7717/peerj.17473)
Supplement: Supplemental Information 4 — The expression level of SlZIP11 in ZIP11 transgenic and CK plants. Zinc content in MG fruits of ZIP11 transgenic and CK plants. Signifificance compared to control was determined by Student’s t test at *P<0.05, **P<0.01. [file peerj-12-17473-s004.xlsx]

## Sheet: Sheet1
The expression level of SlZIP11 in ZIP11 transgenic and CK plants.
CK	1	0.07026
OE-1	5.64053	0.46879
OE-2	7.51236	0.57642
OE-3	9.73361	0.62988
TRV	1	0.09193
TRV-ZIP11-1	0.21439	0.01042
TRV-ZIP11-2	0.37684	0.06402
TRV-ZIP11-3	0.35891	0.02536
Zinc content in MG fruits of ZIP11 transgenic and CK plants.
	Zn(mg/kg)
		Average	StDev
CK1	266.22	268.427	3.78989
CK2	273.76
CK3	265.3
TRV-ZIP11-1	281.98	281.827	1.82401
TRV-ZIP11-2	279.52
TRV-ZIP11-3	283.98
		Average	StDev
CK1	122	135.483	10.5651
CK2	147.8
CK3	136.65
OE-ZIP11-1	62.05	64.5833	4.38356
OE-ZIP11-2	60.95
OE-ZIP11-3	70.75
