# Supplementary material for: SlZIP11 mediates zinc accumulation and sugar storage in tomato fruits
Source: PeerJ. 2024 May 29;12:e17473. doi: 10.7717/peerj.17473 (PMC11143971; doi:10.7717/peerj.17473)
Supplement: Supplemental Information 5 — Sugar content in fruits of TRV-ZIP11 and TRV plants at MG and RR stage. Sugar content in OE-ZIP11 and CK fruits at MG and RR stage. Signifificance compared to control was determined by Student’s t test at *P<0.05, **P<0.01. [file peerj-12-17473-s005.xlsx]

## Sheet: Sheet1
Fruit sugar content in SlZIP11 transgenic plants.
Sum
MG
	Fru	Glu	Suc
CK	13.6014	12.3712	3.98536		2.32621	1.88774	0.510876
OE-1	12.5975	11.7142	4.68823		0.167891	0.686538	0.0381897
OE-2	19.5333	18.9328	3.36596		0.810715	0.798695	0.377389
OE-3	15.4947	14.9155	2.9042		0.534192	0.719942	0.319369
RR
	Fru	Glu	Suc
CK	14.2621	11.1032	2.38742		2.27096	1.48168	0.202111
OE-1	28.4094	23.8481	2.20009		2.11644	3.13485	0.2001
OE-2	41.4531	39.5912	1.97706		4.06026	4.95969	0.251393
OE-3	25.0908	22.6185	1.50924		0.766572	0.419267	0.0675772
MG
	Fru	Glu	Suc
TRV	10.0501	7.10671	2.56687		0.306287	0.862568	0.43344
TRV-ZIP11-1	12.8557	10.5715	3.49287		0.394462	0.230922	0.171263
TRV-ZIP11-2	10.8148	8.38431	3.56387		1.11991	0.986645	0.888054
TRV-ZIP11-3	9.82855	7.84023	2.42808		0.274855	0.217193	0.0697913
RR
	Fru	Glu	Suc
TRV	10.5789	5.26666	1.63682		0.699535	0.151357	0.387512
TRV-ZIP11-1	13.0294	6.43758	0.955709		0.0171751	0.848781	0.159098
TRV-ZIP11-2	12.2523	5.08927	0.564306		0.907804	0.340424	0.235634
TRV-ZIP11-3	15.0037	8.36756	1.31846		0.649006	0.459139	0.215158
Stage
MG
						average			StDEV
	Lines	Fru	Glu	Suc		Fru	Glu	Suc
	CK1G	9.70634	6.27173	2.26038		10.0501	7.10671	2.56687	0.250082	0.704284	0.250247
	CK2G	10.1502	7.99444	2.56687
	CK3G	10.2939	7.05396	2.87336
	TRV-ZIP11-1	13.1346	10.4082	3.61397		12.8557	10.5715	3.49287	0.278927	0.163287	0.121101
		12.5768	10.7348	3.37177
	TRV-ZIP11-2	11.6067	9.08197	2.93592		10.8148	8.38431	3.56387	0.791895	0.697664	0.627949
		10.0229	7.68665	4.19182
	TRV-ZIP11-3	10.0229	7.68665	2.47743		9.82855	7.84023	2.42808	0.194352	0.153579	0.0493499
		9.6342	7.9938	2.37873
RR	CK1R	10.0842	5.15964	1.91083		10.5789	5.26666	1.63682	0.494646	0.107025	0.274013
	CK2R	11.0735	5.37369	1.36281
	TRV-ZIP11-1	13.0416	5.8374	0.843209		13.0294	6.43758	0.955709	0.0121446	0.600179	0.112499
		13.0173	7.03776	1.06821
	TRV-ZIP11-2	11.6103	5.32998	0.730924		12.2523	5.08927	0.564306	0.641914	0.240716	0.166618
		12.8942	4.84855	0.397688
	TRV-ZIP11-3	14.5447	8.0429	1.4706		15.0037	8.36756	1.31846	0.458917	0.324661	0.152139
		15.4626	8.69222	1.16632
RR						average			StDEV
		Fru	Glu	Suc		Fru	Glu	Suc
	CK	10.8603	9.12969	2.50505		14.2621	11.1032	2.38742	2.0731	1.35258	0.184501
		12.3651	9.94292	2.23087
		16.3221	11.0281	2.26057
		16.2478	13.0788	2.54817
		13.9821	10.9893	2.14097
		15.7952	12.4502	2.63888
	OE-ZIP11-1	26.7747	22.975	2.4285		28.4094	23.8481	2.20009	1.72807	2.55959	0.163381
		27.6535	21.2423	2.11608
		30.8	27.3269	2.0557
	OE-ZIP11-2	40.9743	40.0453	2.23835		41.4531	39.5912	1.97706	3.31519	4.04957	0.205262
		37.6535	34.4201	1.7369
		45.7316	44.3082	1.95593
	OE-ZIP11-3	25.8638	23.0812	1.54674		25.0908	22.6185	1.50924	0.625903	0.34233	0.0551765
		24.3308	22.2637	1.54974
		25.0777	22.5108	1.43122
MG						average			StDEV
		Fru	Glu	Suc		Fru	Glu	Suc
	CK	10.7202	10.4331	4.22129		13.6014	12.3712	3.98536	2.01456	1.63483	0.442431
		13.2978	14.6073	3.66196
		14.0173	11.25	3.4728
		16.3703	13.1942	4.58537
	OE-ZIP11-1	12.4788	11.2288	4.66123		12.5975	11.7142	4.68823	0.118717	0.485455	0.0270042
		12.7162	12.1997	4.71524
	OE-ZIP11-2	16.1045	15.668	3.18987		15.4947	14.9155	2.9042	0.436166	0.58783	0.260764
		15.1091	14.2332	2.5594
		15.2706	14.8452	2.96334
	OE-ZIP11-3	20.1066	19.4975	3.09911		19.5333	18.9328	3.36596	0.573262	0.564762	0.266854
		18.9601	18.368	3.63282
